# Supplementary material for: Genetic diversity and population structure of the primary malaria vector Anopheles sinensis (Diptera: Culicidae) in China inferred by cox1 gene
Source: PubMed Central journal article supplement (PMC5439230; doi:10.1186/s13071-017-2013-z), 2017-02-10
Supplement: 13071_2017_2013_MOESM1_ESM.pdf [file 13071_2017_2013_MOESM1_ESM.pdf]

|         |                                                            |    |          |
|---------|------------------------------------------------------------|----|----------|
| Hap_95  | .....G.....T.A.....A...T.....C...                          | 1  | KX779623 |
| Hap_96  | .....G.....CA.....T.....T.....G.T...C...                   | 1  | KX779624 |
| Hap_97  | ...C.C...C.G...T...T.A.....TG.....A...CG.....T.....C...    | 1  | KX779625 |
| Hap_98  | .....G.....T...A.....AT.....G...G...CG.....T.....T...CG... | 1  | KX779626 |
| Hap_99  | T...C...C.G...T...T.A.....G...G...CG.....A...              | 1  | KX779627 |
| Hap_100 | ...C...C.G...T...T.A.....G...G...G...CG.....A...           | 1  | KX779628 |
| Hap_101 | .....G.....A...A...AT...A.....C...                         | 1  | KX779629 |
| Hap_102 | .....G.....A...C...T.....T.....G...C...                    | 2  | KX779630 |
| Hap_103 | .....G.....A...C...IG.....T.....G...C...                   | 1  | KX779631 |
| Hap_104 | .....G.....CA.....IG.....T.....C...                        | 1  | KX779632 |
| Hap_105 | .....A...A...AT...A...T.....T...C.C...                     | 1  | KX779633 |
| Hap_106 | .....A...C...AT...A...A...T.....C.C...C                    | 1  | KX779634 |
| Hap_107 | .....A...C...AT...T.....C.C...                             | 1  | KX779635 |
| Hap_108 | .....A...C...AT...T.....C...                               | 1  | KX779636 |
| Hap_109 | .....A...T...T...A...T...T...C.C...                        | 1  | KX779637 |
| Hap_110 | .....A...T...AT...T.....C...                               | 1  | KX779638 |
| Hap_111 | .....A...G...C.....T.....C...                              | 1  | KX779639 |
| Hap_112 | .....A.....C.....C.....T.....CA...                         | 1  | KX779640 |
| Hap_113 | .....T.A.....T.....T.....T.....CA...                       | 1  | KX779641 |
| Hap_114 | ...C.G...A...T.....C...T.....C...                          | 1  | KX779642 |
| Hap_115 | .....G.....A...T.....T.....T...C...                        | 2  | KX779643 |
| Hap_116 | .....G.....A...C.....C.....C...                            | 1  | KX779644 |
| Hap_117 | ...C...GA...T.A...C.....C...                               | 1  | KX779645 |
| Hap_118 | ...C...GA...T.A...C.....C...                               | 1  | KX779646 |
| Hap_119 | ...C...G...T...T.A...G...G...C...C...                      | 1  | KX779647 |
| Hap_120 | ...C.G...T...T.A...G...G...CG...T...A...                   | 1  | KX779648 |
| Hap_121 | ...C.G...T...T.A...IG...G...C.CG...T...A.C                 | 1  | KX779649 |
| Hap_122 | ...C...C.G...T...T.A...G...T...G...G...G...A...            | 16 | KX779650 |
| Hap_123 | ...C...G...T...T.A...G...G...CG...T...A...                 | 1  | KX779651 |
| Hap_124 | ...G...T...T.A...G...G...G...G...T...T...CA...             | 1  | KX779652 |
| Hap_125 | ...G...T...T.A...G...G...G...G...T...C...                  | 1  | KX779653 |
| Hap_126 | ...G...T...GT.A...A...G...T...T...CG...                    | 1  | KX779654 |
| Hap_127 | .....A.....G.....C.....G.....T.....C...                    | 1  | KX779655 |
| Hap_128 | .....A.....C.....C.....T.....C...                          | 1  | KX779656 |
| Hap_129 | .....A...G...G...G...G...T.....C...                        | 1  | KX779657 |
| Hap_130 | .....A.....G...G...G...T.....C...                          | 1  | KX779658 |
| Hap_131 | .....A...G...T...G...G...T.....C...                        | 1  | KX779659 |
| Hap_132 | .....A...T...C...G...G...T.....C...                        | 1  | KX779660 |
| Hap_133 | .....A...A...AT...G...G...T.....C.C...                     | 1  | KX779661 |
| Hap_134 | .....A...T...C...C...T...T...C...                          | 1  | KX779662 |
| Hap_135 | .....A...T...T...T...T...C.C...                            | 1  | KX779663 |
| Hap_136 | ...C...G...A...A...G...G...A...G...T...T...C...            | 1  | KX779664 |
| Hap_137 | .....G...T...G.T.A...G...G...A...G...T...T...C...          | 1  | KX779665 |
| Hap_138 | .....A...G...T...T...T...T...C...                          | 1  | KX779666 |
| Hap_139 | ...C...C...A...G...A...T...A...T...T...C...                | 1  | KX779667 |
| Hap_140 | .....C...A.....G.....T.....C...                            | 2  | KX779668 |
| Hap_141 | .....A.....G.....T.....C...                                | 2  | KX779669 |
| Hap_142 | .....A.....T.....T.....C...                                | 3  | KX779670 |
| Hap_143 | ...C...A...A.G...G...T.....C...                            | 1  | KX779671 |
| Hap_144 | .....A...A...G...G...T.....C...                            | 1  | KX779672 |
| Hap_145 | .....A...A...G...G...T.....C...                            | 1  | KX779673 |
| Hap_146 | .....A...A...T...C...C...T.....C...                        | 1  | KX779674 |
| Hap_147 | ...G...A...C...T...T...G...C...                            | 1  | KX779675 |
| Hap_148 | ...G...A...T...T...T...G...C...                            | 1  | KX779676 |
| Hap_149 | ...C...G...T.A...G...G...G...C...                          | 1  | KX779677 |
| Hap_150 | ...G.C...G...T.A...G...G...G...C...                        | 1  | KX779678 |
| Hap_151 | ...C.G...T...T.A...G...G...G...CG...C...                   | 1  | KX779679 |
| Hap_152 | .....T...T.A...G...G...G...G...G...T...T...CA...           | 1  | KX779680 |
| Hap_153 | ...C...G...T...T.A...A...C...G...T...T...CA...             | 1  | KX779681 |
| Hap_154 | ...C...G...T...T.A...A...A...C...C...                      | 1  | KX779682 |
| Hap_155 | .....G...A...A...G...G...T.....C...                        | 1  | KX779683 |
| Hap_156 | ...C...G...A...G...G...A...A...T.....C...                  | 1  | KX779684 |
| Hap_157 | ...A...G...A...A...T.....C...                              | 1  | KX779685 |
| Hap_158 | .....A...G...G...T.....C...                                | 1  | KX779686 |
| Hap_159 | .....A...C...G...T.....C...                                | 1  | KX779687 |
| Hap_160 | .....A...A...T...T...T...C...                              | 1  | KX779688 |
| Hap_161 | .....A...A...A...C...T...T...C...                          | 1  | KX779689 |
| Hap_162 | .....A...A...A...C...T...T...C...                          | 1  | KX779690 |
| Hap_163 | ...G...A...A...A...A...A...T...T...C...                    | 1  | KX779691 |
| Hap_164 | .....A...A...A...A...A...T...T...C...                      | 1  | KX779692 |
| Hap_165 | ...A...A...A...A...A...T...T...C...                        | 1  | KX779693 |
| Hap_166 | .....G...A...A...T...C...C...C...C...                      | 1  | KX779694 |
| Hap_167 | .....G...A...A...T...T...GC.C...                           | 1  | KX779695 |
| Hap_168 | .....G...A...A...T...C...T...C...                          | 1  | KX779696 |
| Hap_169 | .....G...A...A...T...T...C...                              | 1  | KX779697 |
| Hap_170 | ...G...C...C.G...T...T.A...G...G...CG...T...C...           | 1  | KX779698 |
| Hap_171 | ...C...C.G...T...T.A...G...G...CG...T...C...               | 1  | KX779699 |
| Hap_172 | .....G...T...GT.A...TG...G...G...T...T...C...              | 1  | KX779700 |
| Hap_173 | .....A...G...A...T...G...G...T...T...C...                  | 1  | KX779701 |
| Hap_174 | .....G...A...C...T...C...C...C...C...                      | 1  | KX779702 |
| Hap_175 | .....G...A...C...T...C...G...C...C...                      | 1  | KX779703 |
| Hap_176 | .....A...C...A...T...C...T...C...                          | 1  | KX779704 |
| Hap_177 | .....A...A...C...C...T...T...C...                          | 2  | KX779705 |
| Hap_178 | .....A...C...CA...T...T...C...                             | 1  | KX779706 |
| Hap_179 | .....A...A...C...CA...T...T...C...                         | 1  | KX779707 |
| Hap_180 | .....A...A...C...G...G...T...T...C...                      | 1  | KX779708 |
| Hap_181 | ...C...A...A...A...G...G...T...T...C...                    | 1  | KX779709 |
| Hap_182 | .....A...A...A...G...G...T...T...C...                      | 1  | KX779710 |
| Hap_183 | .....A.G...A...A...G...G...T...T...C...                    | 1  | KX779711 |
| Hap_184 | .....A...A...A...G...G...T...T...C...                      | 1  | KX779712 |
| Hap_185 | .....A...A...G...AT...T...T...C...                         | 1  | KX779713 |
| Hap_186 | ...G...A...A...T...T...C...                                | 1  | KX779714 |
| Hap_187 | .....AG...A...T...T...C...C...C...                         | 1  | KX779715 |
| Hap_188 | ...G...T.A...A...T...C...C...C...                          | 1  | KX779716 |
| Hap_189 | ...G...T.A.G...G...A...T...A...C...C...                    | 1  | KX779717 |
| Hap_190 | .....A...A...A...A...A...C...C...                          | 4  | KX779718 |
| Hap_191 | .....A...A...A...A...A...C...C...                          | 1  | KX779719 |
| Hap_192 | .....A...A...A...A...A...G...C...                          | 1  | KX779720 |
| Hap_193 | .....G...GA...G...T...T...C...                             | 1  | KX779721 |
| Hap_194 | ...C...G...A...A...T...T...C...                            | 1  | KX779722 |
| Hap_195 | .....G...A...AT...T...T...C.C...                           | 1  | KX779723 |
| Hap_196 | .....G...G...C...CA...T...A...T...T...C...                 | 1  | KX779724 |
| Hap_197 | ...G...C.G...C...CA...T...T...T...C...                     | 1  | KX779725 |
| Hap_198 | .....G...G...CA...T...G...CT...T...C...                    | 1  | KX779726 |
| Hap_199 | .....T...A...A...T...T...C...                              | 1  | KX779727 |

|         |                                                     |   |          |
|---------|-----------------------------------------------------|---|----------|
| Hap_200 | .....A.....C.....G.....                             | 1 | KX779728 |
| Hap_201 | .....A.....C.....                                   | 1 | KX779729 |
| Hap_202 | .....T.....A.....                                   | 1 | KX779730 |
| Hap_203 | .....A.....A.....                                   | 5 | KX779731 |
| Hap_204 | .....GA.....A.....                                  | 2 | KX779732 |
| Hap_205 | .....A.....A.....A.....A.....                       | 1 | KX779733 |
| Hap_206 | .....G.....A.....A.....A.....                       | 1 | KX779734 |
| Hap_207 | .....A.....T.....T.....T.....                       | 1 | KX779735 |
| Hap_208 | .....A.....T.....T.....G.....                       | 1 | KX779736 |
| Hap_209 | .....A.....C.....T.....T.....A.....G.....           | 1 | KX779737 |
| Hap_210 | .....G.....G.....A.....T.....T.....C.....           | 1 | KX779738 |
| Hap_211 | .....C..G...T...T.A...T...T...G...T...C...          | 1 | KX779739 |
| Hap_212 | .....C..G...T...T.A...T...G...A...CG...T...T...     | 1 | KX779740 |
| Hap_213 | .....C..G...T...T.A...TG...G...C..CG...T...T...C    | 2 | KX779741 |
| Hap_214 | .....C..G...T...T.A...TG...G...C..CG...T...T...     | 1 | KX779742 |
| Hap_215 | .....A.....T...G.....C.....                         | 1 | KX779743 |
| Hap_216 | .....A.....G.....T.....C.....                       | 1 | KX779744 |
| Hap_217 | .....C.....C.....A.....A.....T.....C.....           | 1 | KX779745 |
| Hap_218 | .....C.....A.....A.....C.....                       | 1 | KX779746 |
| Hap_219 | .....A.....C.....A.....C.....                       | 1 | KX779747 |
| Hap_220 | .....A.....A.....C.....                             | 8 | KX779748 |
| Hap_221 | .....A.....A.....C.....C.....                       | 8 | KX779749 |
| Hap_222 | .....A.....GA.....C.....                            | 1 | KX779750 |
| Hap_223 | .....A.....A.....G...C...C...                       | 1 | KX779751 |
| Hap_224 | .....A.....A.....C.....C.....                       | 1 | KX779752 |
| Hap_225 | .....C.....A.....A.A.....C.....                     | 1 | KX779753 |
| Hap_226 | .....A.....A.....T...C...C...                       | 1 | KX779754 |
| Hap_227 | .....G.....G.....CA.....AT...G...T...C...           | 1 | KX779755 |
| Hap_228 | .....C...C..G...T...T.A...T...G...G...CG...A...     | 1 | KX779756 |
| Hap_229 | .....C...C..G...T...T.A...G...T...G...G...G...A...  | 3 | KX779757 |
| Hap_230 | .....GC...C..G...T...T.A...G...T...G...G...G...A... | 2 | KX779758 |
| Hap_231 | .....C...C..G...T...T.A...G...T...G...G...G...A...  | 1 | KX779759 |
| Hap_232 | .....G.....CA.....T...G...CT...C...C...             | 1 | KX779760 |
| Hap_233 | .....G.....G.....CA.....G...CT...C...C...           | 1 | KX779761 |
| Hap_234 | .....G.....G...C...CA.....T...A...T...C...C...      | 1 | KX779762 |
| Hap_235 | .....C..G...A.....T...T...C...C...                  | 1 | KX779763 |
| Hap_236 | .....A...C.....G.....                               | 1 | KX779764 |
| Hap_237 | .....A.....C.....                                   | 2 | KX779765 |
| Hap_238 | .....GA.....A.....C.....                            | 1 | KX779766 |
| Hap_239 | .....C...G...T...T.A...G...G...CT...C...C...        | 1 | KX779767 |
| Hap_240 | .....G..G.T...GT.A...G...G...G...G...T..T...C...    | 1 | KX779768 |
| Hap_241 | .....G...T...A...A...T...C...T...C...C...           | 1 | KX779769 |
| Hap_242 | .....G...A...A...T...C...T...C...C...               | 1 | KX779770 |
| Hap_243 | .....G...A...A...T...C...T...C...C...               | 1 | KX779771 |
| Hap_244 | .....G...A...A...T...C...C...C...C...               | 1 | KX779772 |
| Hap_245 | .....A...A...T...C...C...C...C...                   | 2 | KX779773 |
| Hap_246 | .....A...A...A...C...C...C...C...                   | 1 | KX779774 |
| Hap_247 | .....A...A...A...T...C...C...C...C...               | 1 | KX779775 |

H= Haplotype number, N= Haplotype frequency, AN= accession number.
